# Supplementary material
Source: PubMed Central journal article supplement (PMC4868643)
Supplement: NIHMS767906-supplement-1.pdf [file NIHMS767906-supplement-1.pdf]

## Supplementary Figure 1

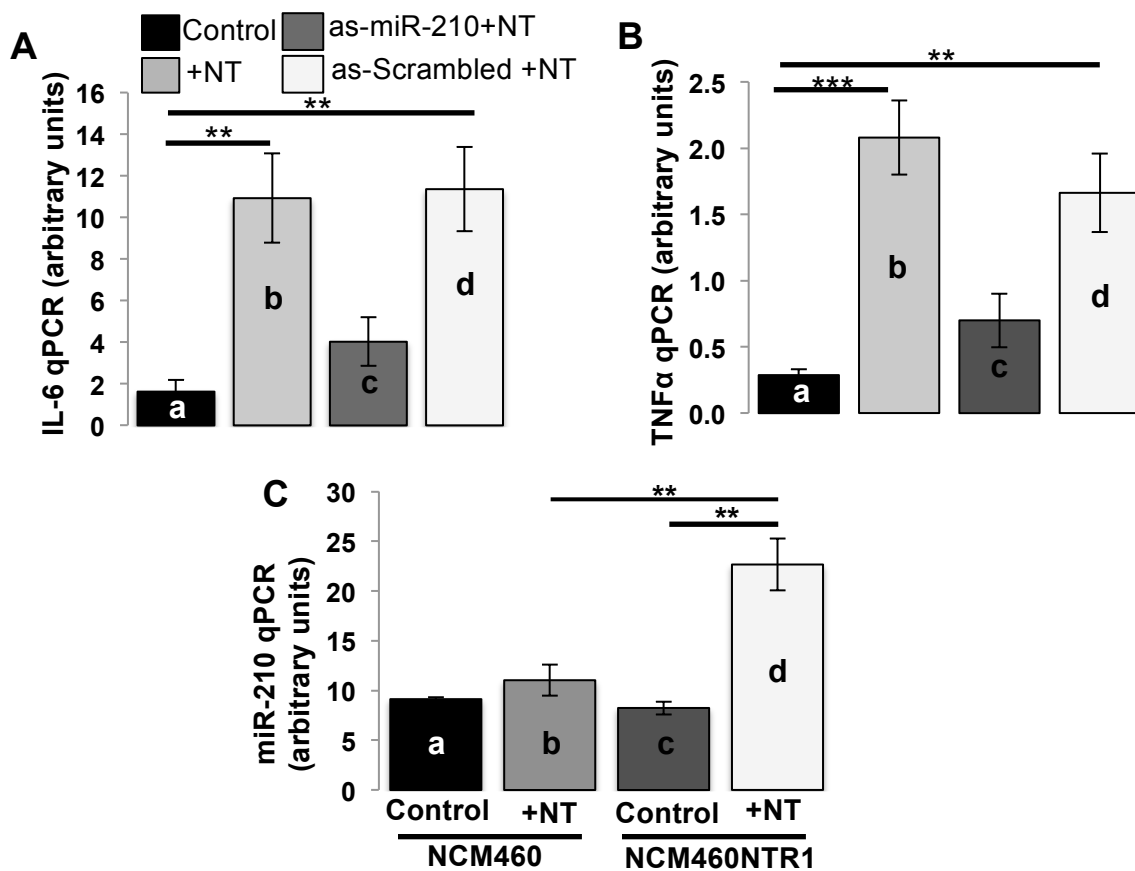

NCM460 cells stably transfected as indicated with NTR1 (NCM460NTR1) were treated as indicated for 6 h with NT ( $10^{-7}$ M). **(A & B)** Cells were also treated as indicated with as-miR-210 or as-Scrambled, and **(A)** IL-6 and **(B)** TNF $\alpha$  levels of expression were assessed using qPCR. **(C)** MiR-210 levels of expression were assessed using qPCR. Statistical analysis was performed using student's t test.

\*\*p<0.01, \*\*\*p<0.001

### IL-6

**a vs b:** p=0.0056

**a vs d:** p=0.0036

### TNF $\alpha$

**a vs b:** p=0.0007

**a vs d:** p=0.0037

### miR-210

**b vs d:** p=0.0088

**c vs d:** p=0.0018

**Supplementary Figure 2**

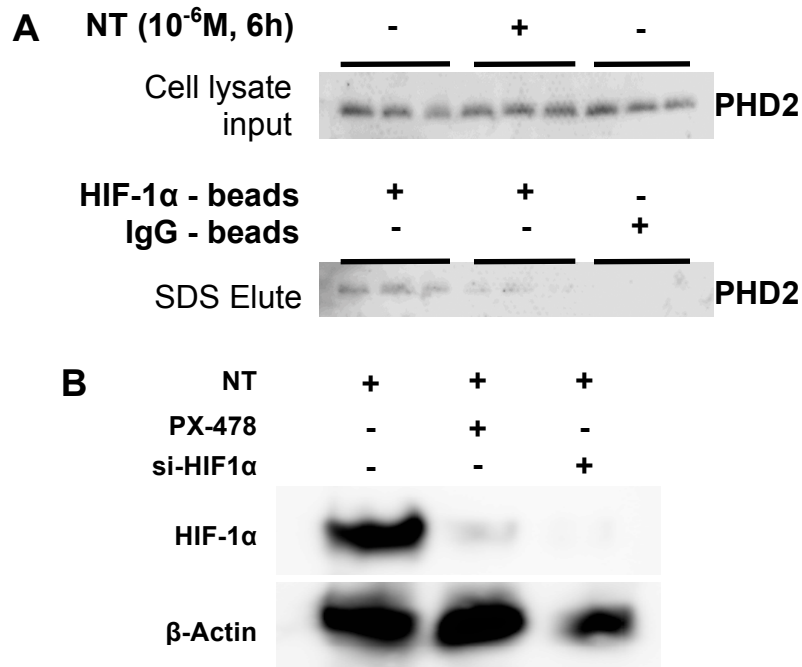

NCM460 cells stably transfected with NTR1 (NCM460NTR1) were treated as indicated with **(A)** NT ( $10^{-7}$ M, 6 h) and **(B)** NT ( $10^{-7}$ M, 6 h) in the presence or absence of pretreatment with PX-478 ( $40 \times 10^{-6}$  M, 18 h) or with si-HIF-1α. **(A)** Equal protein of and total cell lysates were incubated with Dynal magnetic beads coupled as indicated with anti-HIF-1α monoclonal antibody or non-specific human IgG. HIF-1α bound prolyl-hydroxylase 2 (PHD2) was detected by Western Blot analysis of the resulting SDS elutes using anti-PHD2 antibody. Normalization was achieved via incubation of equal protein cell lysate with antibody bound beads between samples. **(B)** Western blot analysis of total cell lysates was performed using anti-HIF-1α monoclonal antibody followed by anti-β-Actin polyclonal antibody serving as loading control. Data are represented by cropped images from the two separate original membranes.

### Supplementary Figure 3

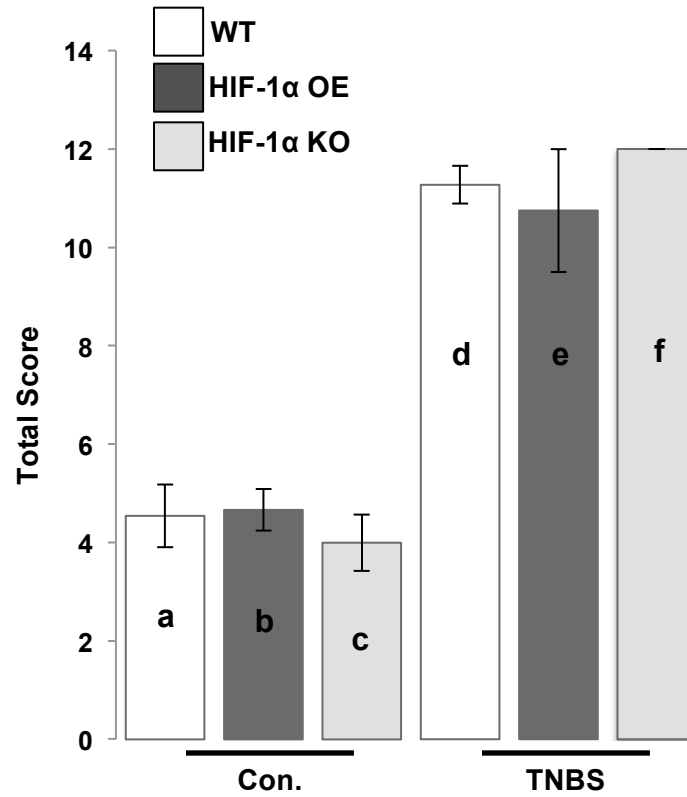

HIF-1 $\alpha$ -OE, HIF-1 $\alpha$ -KO and control littermates (n=3 up to n=11) were treated as indicated with TNBS and total histological score of H&E staining of colon tissues was assessed.

## Supplementary Figure 4

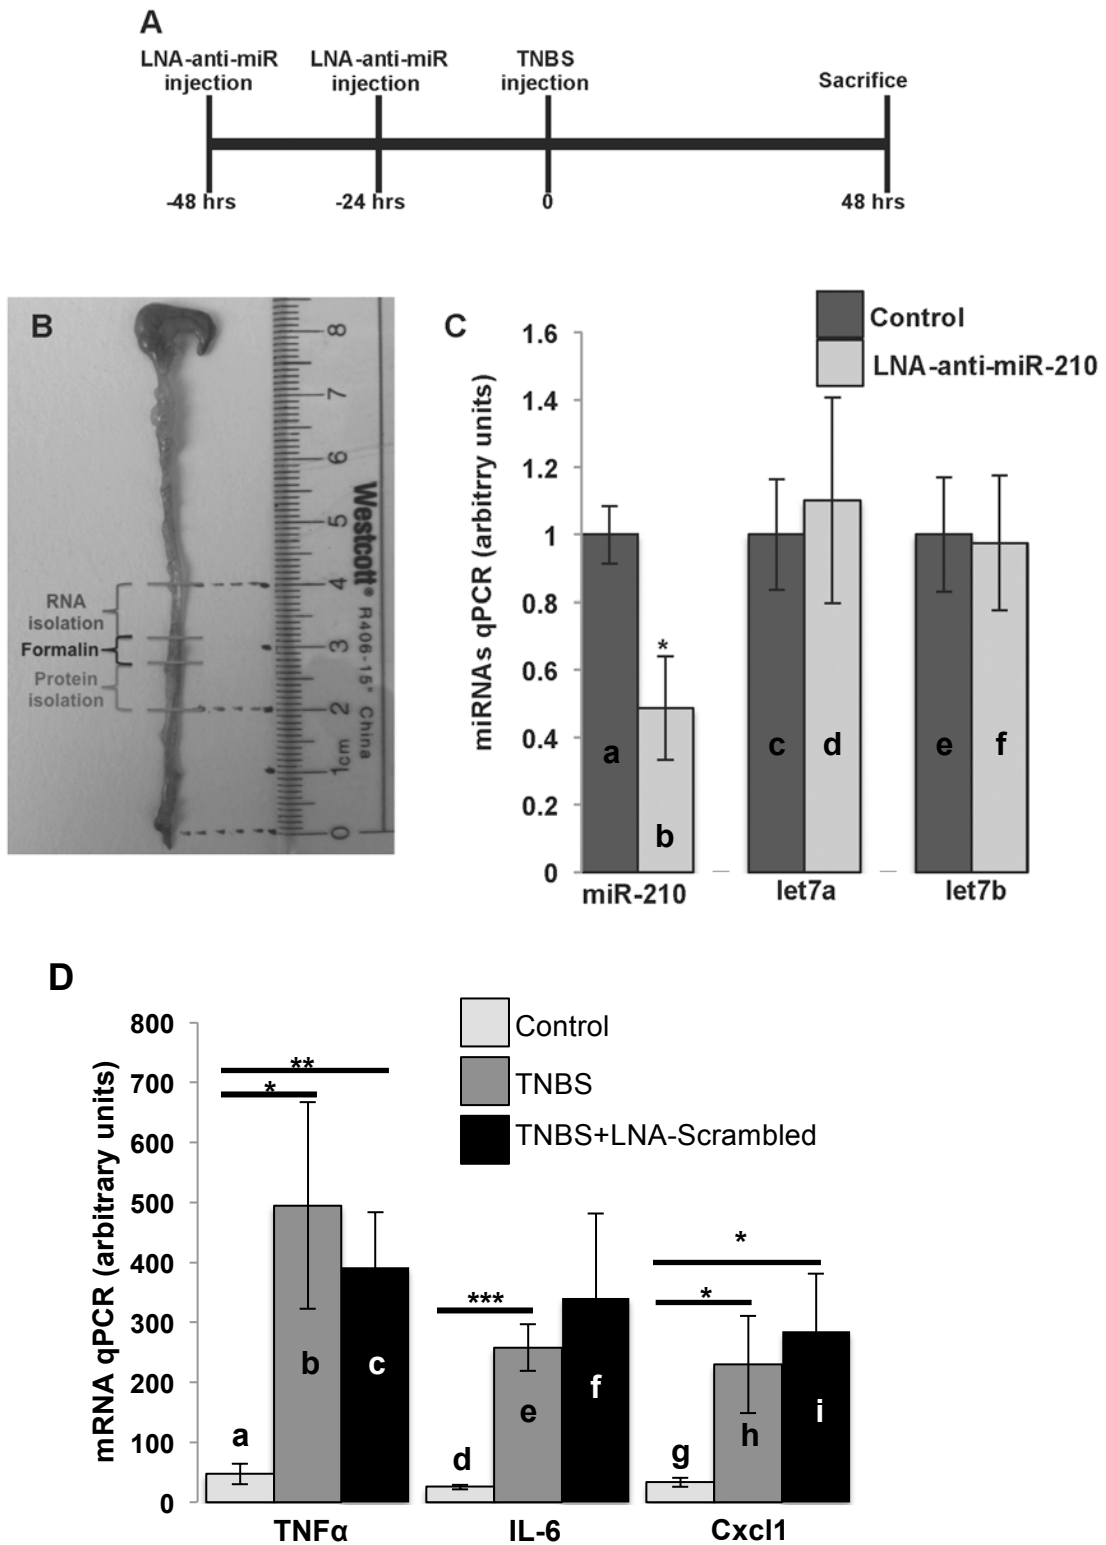

**(A)** Mice received intracolonic enema of LNA-anti-miR-210 (10mg/kg), 48 h and 24 h before receiving intracolonic enema of TNBS (500mg/kg). 48 h later mice (n=8 per group) were sacrificed and **(B)** colon tissues were collected for RNA and protein isolation as well as immunohistochemistry (immersion in formalin). **(C)** Levels of expression for miR-210, let7a and let7b were assessed by qPCR. **(D)** Control (C57BL6/J) mice untreated (control) or received as indicated intracolonic enema of non-specific LNA-Scrambled (10mg/kg), 48 h and 24 h before receiving as indicated intracolonic enema of TNBS (500mg/kg). 48 h later mice (n=4) were sacrificed, colon tissues were collected for RNA isolation and expression levels of the inflammatory markers TNF $\alpha$  (**a vs b**: p=0.0438; **a vs c**: p=0.0039; **b vs c**: p=0.4101), IL-6 (**d vs e**: p=0.0006; **d vs f**: p=0.0874; **e vs f**: p=0.0874), and Cxcl1 (**g vs h**: p=0.0522; **g vs i**: p=0.0405; **h vs i**: p=0.6772) were assessed by qPCR. Statistical analysis was performed using student's t test. \*p<0.05, \*\*p<0.01, \*\*\*p<0.001
